# Supplementary material for: Biochar Improves Soil Aggregate Stability and Water Availability in a Mollisol after Three Years of Field Application
Source: PLoS One. 2016 May 18;11(5):e0154091. doi: 10.1371/journal.pone.0154091 (PMC4871556; doi:10.1371/journal.pone.0154091)
Supplement: S3 Data — (XLSX) [file pone.0154091.s003.xlsx]

## Sheet: Table1
Treatment	BD(g cm-3)	SOC(g kg-1)	TN(g kg-1)	C/N ration
CK1	1.38	18.39	1.54	12.4542
CK2	1.31	19.77	1.6	11.1777
CK3	1.36	18.69	1.5	11.7361
CK4	1.38	17.9	1.5	11.4248
NPK1	1.36	16.75	1.65	10.7743
NPK2	1.29	17.91	1.61	11.0888
NPK3	1.35	17.5	1.64	11.2659
NPK4	1.28	17.88	1.63	11.0885
NPK+S1	1.216	19.03	1.59	11.1061
NPK+S2	1.261	18.6	1.68	11.0416
NPK+S3	1.286	18.05	1.55	12.1629
NPK+S4	1.27	18.73	1.57	10.887
NPK+B1	1.218	18.75	1.63	11.569
NPK+B2	1.198	20.31	1.69	12.1898
NPK+B3	1.245	19.1	1.66	12.1122
NPK+B4	1.291	18.29	1.68	11.2014
Mean
CK	1.3575	18.6875	1.54	11.7
NPK	1.32	17.51	1.63	11.1
NPK+S	1.25825	18.6025	1.6	11.3
NPK+B	1.238	19.1125	1.67	11.8
SD
CK	0.03304	0.79172	0.05	0.55
NPK	0.04082	0.53994	0.02	0.2
NPK+S	0.03	0.40999	0.06	0.58
NPK+B	0.04024	0.8645	0.03	0.47
CK	a	a	c	a
NPK	a	b	ab	a
NPK+S	b	a	b	a
NPK+B	b	a	a	a
